# Supplementary material for: Clinical variable-based cluster analysis identifies novel subgroups with a distinct genetic signature, lipidomic pattern and cardio-renal risks in Asian patients with recent-onset type 2 diabetes
Source: Springer Nature journal article supplement (doi:10.1007/s00125-022-05741-2), 2022-06-28
Supplement: MOESM1 [file 125_2022_5741_MOESM1_ESM.pdf]

**Clinical variable- based cluster analysis identifies novel subgroups with a distinct genetic signature, lipidomic pattern and cardio-renal risks in Asian patients with recent-onset type 2 diabetes**

Jiexun Wang, Jian-Jun Liu, Resham L Gurung, Sylvia Liu, Janus Lee, Yiamunaa M, Keven Ang, Yi Ming Shao, Justin I-Shing Tang, Perter I Benke, Federico Torta, Markus R Wenk, Subramaniam Tavintharan, Wern Ee Tang, Chee Fang Sum and Su Chi Lim

**ESM Methods**

**Beta cell dysfunction, insulin resistance and type 1 diabetes polygenic risk score (PRS)**

Beta cell dysfunction PRS was created based on 35 single nucleotide polymorphisms (SNPs) associated with insulin secretion in Asian population. We weighted the SNPs by their effect on risk of type 2 diabetes in the East Asian population to study whether the novel subgroups differ in genetic risks for development of type 2 diabetes [1]. Specifically, we assumed an additive genetic model and applied a linear weighting of 0, 1, and 2 for genotypes containing 0, 1, and 2 risk alleles, respectively, i.e. weighted PRS =  $(\beta_1 \times \text{SNP1} + \beta_2 \times \text{SNP2} + \dots + \beta_n \times \text{SNPn}) \times (n / \text{sum of the } \beta\text{-coefficients})$ , where  $\text{SNPi}$  is the number of risk allele for each SNP and  $\beta_i$  is the effect size for that specific SNP. We created insulin resistance PRS based on 20 SNPs associated with insulin sensitivity by the same approach. A high PRS score indicates a high genetic risk for beta cell dysfunction and insulin resistance, respectively. Assuming a log- additive model, we included 9 SNPs associated with risk for type 1 diabetes in non-Caucasian population to

construct PRS for type 1 diabetes. For the 7 non-DR3/DR4 SNPs, we applied a linear weighting of 0, 1, and 2 for genotypes containing 0, 1, and 2 risk alleles and multiplied by their effects on risk of type 1 diabetes. For DR3/DR4-DQ8 contribution, we imputed DR3/DR4-DQ8 haplotypes and the corresponding weights were assigned to each individuals score [2-4]. The final type 1 diabetes PRS was obtained from the sum of these two sets of SNPs divided by 15. GWAS genotyping, quality control procedures and principal component (PC) analysis have been described previously [5].

### **Lipidomics Assay by LC-MS**

Plasma samples were randomized for each cohort, respectively, before analytical assay. Batch quality control (BQC) samples were prepared by pooling equal amount of aliquot from all plasma samples in each cohort, respectively, before lipid extraction. Plasma (10  $\mu$ L) was mixed with 190  $\mu$ L 1-butanol/methanol (BuMe, 1:1 v/v) containing internal standards. The mixture was vortexed for 30 s, then sonicated for 30 min at 20°C. The samples were then centrifuged at 14,000 x g for 10 min at 10°C and the supernatant was carefully transferred into autosampler vials, not to disturb the precipitated protein pellets. Extracted blanks were prepared using the same extraction protocol, using 10  $\mu$ L BuMe instead of plasma samples. Technical quality control (TQC) samples were generated by pooling the lipid extracts of study samples to measure instrumental variability.

Reverse Phase chromatographic separation of plasma samples was based on a modified version of Huynh et al [6]. The analysis was carried out on an Agilent 6495 QQQ and Infinity-II LC-MS system, using a Zorbax RRHD Eclipse Plus C18, 95Å (2.1 x 100 mm, 1.8  $\mu$ m) column. The mobile

phases consisted of (A) 10 mmol/L ammonium formate and formic acid (0.1%) in water/acetonitrile/2-propanol (50:30:20, v/v) and (B) 10 mmol/L ammonium formate and formic acid (0.1%) in 2-propanol/ acetonitrile/water (90:9:1, v/v). Using a flow rate of 0.4 mL/min, the gradient started from 15% B to 50% B in 2.5 min, 50 to 57% B in 0.1 min, 57% B to 70% B from 2.6 to 9 min, 70% B to 93% B from in 0.1 min, 93% B to 96% B from 9.1 to 11 min, 96% B to 100% B in 0.1 min, where it was maintained till 11.9 min, then re-equilibrated at 15% B for 3 min prior to the next injection. The injection volume was 2  $\mu$ L. Autosampler and column thermostat temperature were at 15°C and 45°C, respectively. Total method run time, including needle wash, was 16.1 min. To test the linear response, TQCs extracts were injected at different volumes.

The mass spectrometer conditions were as follows: Capillary voltage 3500V, Drying gas temperature and flow rate 150°C and 17L/min, Sheath gas temperature and flow rate 200°C and 10L/min, Nebulizer pressure 20 psi. Targeted analysis was performed in Dynamic MRM positive ion mode, using “unit” resolution (0.7 amu) for Q1 and Q3 isolation width.

Chromatographic peaks were annotated based on retention time and specific MRM transitions using Agilent MassHunter Quantitative Analysis software (version B.10.1). Internal standards were used to normalize the raw peak areas in the corresponding lipid class. Endogenous species were quantified using one standard per lipid class thus our method can only deliver relative quantitation results.

## References:

- [1] Spracklen CN, Horikoshi M, Kim YJ, et al. (2020) Identification of type 2 diabetes loci in 433,540 East Asian individuals. *Nature* 582(7811): 240-245. 10.1038/s41586-020-2263-3
- [2] Harrison JW, Tallapragada DSP, Baptist A, et al. (2020) Type 1 diabetes genetic risk score is discriminative of diabetes in non-Europeans: evidence from a study in India. *Sci Rep* 10(1): 9450. 10.1038/s41598-020-65317-1
- [3] Oram RA, Patel K, Hill A, et al. (2016) A Type 1 Diabetes Genetic Risk Score Can Aid Discrimination Between Type 1 and Type 2 Diabetes in Young Adults. *Diabetes Care* 39(3): 337-344. 10.2337/dc15-1111
- [4] Prasad RB, Asplund O, Shukla SR, et al. (2022) Subgroups of patients with young-onset type 2 diabetes in India reveal insulin deficiency as a major driver. *Diabetologia* 65(1): 65-78. 10.1007/s00125-021-05543-y
- [5] Lim SC, Dorajoo R, Zhang X, et al. (2017) Genetic variants in the receptor for advanced glycation end products (RAGE) gene were associated with circulating soluble RAGE level but not with renal function among Asians with type 2 diabetes: a genome-wide association study. *Nephrol Dial Transplant* 32(10): 1697-1704. 10.1093/ndt/gfw263
- [6] Huynh K, Barlow CK, Jayawardana KS, et al. (2019) High-Throughput Plasma Lipidomics: Detailed Mapping of the Associations with Cardiometabolic Risk Factors. *Cell Chem Biol* 26(1): 71-84 e74. 10.1016/j.chembiol.2018.10.008

**ESM Table 1: Single nucleotide polymorphisms (SNPs) and weights for construction of  $\beta$  cell dysfunction and insulin resistance polygenic risk scores (PRS)**

| SNP                          | Nearest gene  | R/A | Effect size |
|------------------------------|---------------|-----|-------------|
| <b>Beta cell dysfunction</b> |               |     |             |
| rs340874                     | PROX1         | C/T | 0.0435      |
| rs11717959                   | IGF2BP2       | G/T | -0.0937     |
| rs4481184                    | IGF2BP2       | T/C | 0.1198      |
| rs6780171                    | IGF2BP2       | A/T | 0.1209      |
| rs1801212                    | WFS1          | A/G | 0.1711      |
| rs4457053                    | ZBED3         | G/A | 0.0736      |
| rs7756992                    | CDKAL1        | G/A | 0.1616      |
| rs9379084                    | RREB1         | G/A | 0.0718      |
| rs9505097                    | RREB1         | C/T | 0.0443      |
| rs10228066                   | DGKB          | T/C | 0.0646      |
| rs791595                     | LEP           | A/G | 0.1165      |
| rs878521                     | GCK           | A/G | 0.0288      |
| rs13262861                   | ANK1          | C/A | 0.1000      |
| rs3802177                    | SLC30A8       | G/A | 0.1104      |
| rs4736819                    | ANK1          | T/C | 0.0720      |
| rs10757283                   | CDKN2A/B      | T/C | -0.0564     |
| rs10811660                   | CDKN2A/B      | G/A | 0.1822      |
| rs10974438                   | GLIS3         | C/A | 0.0670      |
| rs12378717                   | GPSM1         | G/C | 0.1248      |
| rs505922                     | ABO           | C/T | 0.0424      |
| rs10882101                   | HHEX/IDE      | T/C | 0.1273      |
| rs1112718                    | HHEX/IDE      | A/G | 0.1410      |
| rs11257655                   | CDC123/CAMK1D | T/C | 0.1140      |
| rs7903146                    | TCF7L2        | T/C | 0.2724      |
| rs102275                     | TMEM258       | T/C | 0.0295      |
| rs10830963                   | MTNR1B        | G/C | 0.0372      |
| rs2237895                    | KCNQ1         | C/A | 0.1982      |
| rs2237897                    | KCNQ1         | C/T | 0.2476      |
| rs234853                     | KCNQ1         | G/A | -0.1805     |
| rs445084                     | KCNQ1         | G/A | 0.0518      |
| rs77464186                   | CENTD2/ARAP1  | A/C | 0.1399      |
| rs10842994                   | KLHDC5        | C/T | 0.0553      |
| rs1359790                    | SPRY2         | G/A | 0.0877      |
| rs1005752                    | HMG20A        | A/C | 0.0701      |
| rs8038040                    | C2CD4A/B      | G/A | 0.0795      |

|                           |              |     |         |
|---------------------------|--------------|-----|---------|
| <b>Insulin resistance</b> |              |     |         |
| rs3768321                 | MACF1        | T/G | 0.0572  |
| rs10195252                | GRB14/COBLL1 | T/C | 0.0552  |
| rs1260326                 | GCKR         | C/T | 0.0632  |
| rs2052261                 | CEP68        | G/A | -0.0272 |
| rs2249105                 | CEP68        | A/G | 0.0293  |
| rs2972144                 | IRS1         | G/A | 0.0464  |
| rs11709077                | PPARG        | G/A | 0.1097  |
| rs11926707                | KIF9         | C/T | 0.0157  |
| rs28819812                | PDGFC        | C/A | 0.0153  |
| rs465002                  | ANKRD55      | T/C | 0.0734  |
| rs702634                  | ARL15        | A/G | 0.0470  |
| rs9687832                 | ANKRD55      | A/G | 0.0410  |
| rs2280141                 | PLEKHA1      | T/G | 0.0433  |
| rs2738809                 | BCAR1        | G/A | 0.0185  |
| rs2925979                 | CMIP         | T/C | 0.0423  |
| rs12454712                | BCL2A        | T/C | 0.0543  |
| rs10406431                | GIPR         | A/G | 0.0893  |
| rs2238689                 | GIPR         | C/T | 0.0723  |
| rs8107974                 | TM6SF2       | T/A | 0.0282  |
| rs889138                  | PEPD         | C/T | 0.0552  |

R, risk allele; A, alternative allele.

Weight (effect size) for each SNP was derived from meta-analysis of GWAS data from 77,418 individuals with T2D and 356,122 healthy individuals of East Asian ancestry (PMID: 32499647) and calculated as natural log (Odds Ratio). Please also refer to ESM methods.

**ESM Table 2: Single nucleotide polymorphisms (SNPs) for construction of type 1 diabetes polygenic risk scores (PRS)**

| SNP                    | Risk allele | Gene            | Odds Ratio | Weight |
|------------------------|-------------|-----------------|------------|--------|
| rs2476601              | A           | PTPN22          | 1.96       | 0.67   |
| rs1264813              | T           | HLA-A*24        | 1.54       | 0.43   |
| rs2395029              | T           | HLA-B*5701      | 2.5        | 0.92   |
| rs3129889              | A           | HLA-DRB1*15     | 14.88      | 2.70   |
| rs12722495             | T           | IL2RA           | 1.58       | 0.46   |
| rs689                  | T           | INS             | 1.75       | 0.56   |
| rs2292239              | T           | ERBB3           | 1.35       | 0.30   |
| rs2187668<br>rs7454108 | T<br>C      | DR3/DR4-DQ8     | 48.18      | 3.87   |
|                        |             | DR3/DR3         | 21.12      | 3.05   |
|                        |             | DR4-DQ8/DR4-DQ8 | 21.98      | 3.09   |
|                        |             | DR4-DQ8/X       | 7.03       | 1.95   |
|                        |             | DR3/X           | 4.53       | 1.51   |

Details on type 1 diabetes PRS calculation have been described in ESM methods

**ESM Table 3: participant baseline characteristics in lipidomics study**

| Variable                           | Discovery         | Validation        |
|------------------------------------|-------------------|-------------------|
| Number of participants             | 687               | 226               |
| Type 2 diabetes subgroups, N (%)   |                   |                   |
| SIRD-RII                           | 130 (18.9)        | 49 (21.7)         |
| MOD                                | 307 (44.7)        | 95 (42.0)         |
| MARD-II                            | 250 (36.4)        | 82 (36.3)         |
| Index age, years                   | 53.8 (11.6)       | 50.0 (10.2)       |
| Diabetes onset age, years          | 51.0 (11.5)       | 48.4 (10.9)       |
| Male sex, N (%)                    | 349 (50.8)        | 139 (61.5)        |
| Ethnicity, N (%)                   |                   |                   |
| Chinese                            | 328 (48.7)        | 143 (63.3)        |
| Malay                              | 155 (23.0)        | 53 (23.5)         |
| Asian Indian                       | 190 (28.2)        | 30 (13.3)         |
| Diabetes duration, years           | 3.0 [1.0, 5.0]    | 3.0 [1.0, 4.0]    |
| Body mass index, kg/m <sup>2</sup> | 28.5 (5.4)        | 27.8 (5.8)        |
| HbA1c, %                           | 7.4 (1.3)         | 8.1 (1.9)         |
| Blood pressure, mmHg               |                   |                   |
| Systolic                           | 137 (17)          | 133 (17)          |
| Diastolic                          | 80 (9.0)          | 80 (11)           |
| Kidney function                    |                   |                   |
| eGFR, ml/min/1.73m <sup>2</sup>    | 95 (21)           | 94 (25)           |
| Urine ACR, ug/mg                   | 13.0 [4.0, 42.0]  | 19.0 [8.0, 71.5]  |
| Clinical lipid, mmol/L             |                   |                   |
| HDL cholesterol                    | 1.30 (0.38)       | 1.27 (0.37)       |
| LDL cholesterol                    | 2.90 (0.85)       | 3.01 (0.90)       |
| Triacylglycerol                    | 1.38 [1.05, 1.92] | 1.62 [1.12, 2.36] |
| Triacylglycerol/HDL ratio          | 1.1 [0.8, 1.7]    | 1.4 [0.8, 2.1]    |
| Medication usage, N (%)            |                   |                   |
| Insulin                            | 64 (9.4)          | 35 (16.6)         |
| Statins                            | 507 (74.1)        | 159 (70.7)        |
| RAS blockers                       | 322 (47.3)        | 111 (49.3)        |

ACR, albumin-to-creatinine ratio; RAS, renin-angiotensin system; MOD, mild obesity- related diabetes; SIRD-RII, severe insulin- resistant diabetes with relative insulin insufficiency; MARD-II, mild age- related diabetes with insulin insufficiency



**ESM Table 4: Participant baseline characteristics in lipidomics validation study stratified by three subgroups (N=226)**

| <b>Variables</b>                   | <b>MOD</b>        | <b>SIRD-RII</b>   | <b>MARD-II</b>    | <b>p value</b> |
|------------------------------------|-------------------|-------------------|-------------------|----------------|
| Number of Participants (%)         | 95 (42.0)         | 49 (21.7)         | 82 (36.3)         |                |
| Age, years                         | 50.0 [40.0, 61.0] | 41.0 [33.0, 50.0] | 56.0 [50.0, 63.0] | <0.001         |
| Diabetes onset age, years          | 47.0 [38.0, 56.5] | 38.0 [30.8, 47.0] | 52.5 [47.2, 61.0] | <0.001         |
| Male sex, N(%)                     | 66 (69.5)         | 30 (61.2)         | 43 (52.4)         | 0.07           |
| Ethnicity, N(%)                    |                   |                   |                   | 0.02           |
| Chinese                            | 56 (58.9)         | 25 (51.0)         | 62 (75.6)         |                |
| Malay                              | 25 (26.3)         | 18 (36.7)         | 10 (12.2)         |                |
| Asian Indian                       | 14 (14.7)         | 6 (12.2)          | 10 (12.2)         |                |
| Diabetes duration, years           | 2.0 [1.0, 4.0]    | 3.0 [1.0, 4.0]    | 3.0 [1.3, 4.0]    | 0.66           |
| Body mass index, kg/m <sup>2</sup> | 30.4 (4.6)        | 30.8 (6.6)        | 22.9 (2.6)        | <0.001         |
| HbA1c, %                           | 7.1 (0.9)         | 10.5 (1.8)        | 7.8 (1.5)         | <0.001         |
| Blood pressure, mmHg               |                   |                   |                   |                |
| Systolic                           | 137 (16)          | 130 (15)          | 130 (19)          | 0.005          |
| Diastolic                          | 82 (11)           | 81 (12)           | 77 (10)           | 0.003          |
| Kidney function                    |                   |                   |                   |                |
| eGFR, ml/min/1.73m <sup>2</sup>    | 92 (24)           | 104 (22)          | 89 (25)           | 0.002          |
| Urine ACR, ug/mg                   | 19.0 [8.3, 91.0]  | 23.0 [8.0, 70.3]  | 17.0 [7.0, 36.0]  | 0.65           |
| Clinical lipid, mmol/L             |                   |                   |                   |                |
| HDL cholesterol                    | 1.19 (0.29)       | 1.07 (0.30)       | 1.49 (0.39)       | <0.001         |
| LDL cholesterol                    | 2.94 (0.79)       | 3.19 (1.13)       | 2.98 (0.85)       | 0.38           |
| Triacylglycerol                    | 1.73 [1.33, 2.37] | 2.41 [1.84, 3.85] | 1.13 [0.86, 1.61] | <0.001         |
| Triacylglycerol/ HDL ratio         | 1.51 [1.11, 2.12] | 3.01 [1.68, 4.08] | 0.80 [0.59, 1.18] | <0.001         |
| Medication usage, N (%)            |                   |                   |                   |                |
| Insulin                            | 9 (9.9)           | 18 (39.1)         | 8 (10.8)          | <0.001         |
| Statins                            | 68 (71.6)         | 32 (66.7)         | 59 (72.0)         | 0.79           |
| RAS blockers                       | 55 (57.9)         | 22 (45.8)         | 34 (41.5)         | 0.08           |

ACR, albumin-to-creatinine ratio; RAS, renin-angiotensin system; MOD, mild obesity- related diabetes; SIRD-RII, severe insulin- resistant diabetes with relative insulin insufficiency; MARD-II, mild age- related diabetes with insulin insufficiency

**ESM Table 5: Lipid species differed significantly between SIRD-RII and MOD subgroups**

| Lipid species    | Discovery     |            | Validation    |             |
|------------------|---------------|------------|---------------|-------------|
|                  | Coefficient # | p value ## | Coefficient # | p value ### |
| PC (O-36:1)      | 0.17          | 3.17E-05   | 0.18          | 1.17E-02    |
| PC (O-36:4)      | 0.19          | 3.21E-06   | 0.23          | 1.28E-03    |
| PC (O-38:4)      | 0.20          | 1.24E-06   | 0.28          | 1.22E-04    |
| PC (P-40:5)      | 0.14          | 8.01E-04   | 0.19          | 8.82E-03    |
| PE (34:1)        | 0.13          | 1.04E-03   | 0.30          | 1.06E-05    |
| PE (36:4)        | 0.14          | 9.83E-04   | 0.34          | 1.48E-06    |
| PE (P-16:0/22:5) | 0.20          | 2.02E-06   | 0.25          | 6.06E-04    |
| PE (P-18:0/18:1) | 0.16          | 6.93E-05   | 0.27          | 1.58E-04    |
| PE (P-18:1/20:4) | 0.16          | 6.87E-05   | 0.20          | 4.68E-03    |
| Cer (d18:1/18:0) | 0.22          | 6.06E-08   | 0.24          | 6.73E-04    |
| Cer (d18:1/22:0) | 0.21          | 5.33E-07   | 0.24          | 6.14E-04    |
| Cer (d18:1/23:0) | 0.17          | 5.66E-05   | 0.19          | 8.75E-03    |
| SM (36:0)        | 0.20          | 2.27E-07   | 0.25          | 2.64E-04    |
| SM (38:0)        | 0.19          | 1.28E-06   | 0.19          | 3.17E-03    |
| SM (40:1)        | 0.19          | 4.71E-06   | 0.19          | 6.89E-03    |
| SM (41:0)        | 0.20          | 5.02E-07   | 0.27          | 1.12E-04    |
| SM (41:3)        | 0.22          | 1.51E-07   | 0.27          | 2.13E-04    |

# positive coefficient indicates lipid levels were higher in SIRD-RII as compared to MOD subgroup.

## p value < 0.0011 was considered statistically significant in discovery cohort based on Bonferroni correction threshold (0.05/45=0.0011)

### lipids in validation cohort with nominal p < 0.05 and having the same coefficient direction as that in discovery cohort were considered as statistically significant.

PE, phosphatidylethanolamine; PC, phosphatidylcholine; Cer, ceramide; SM, sphingomyelin; MOD, mild obesity- related diabetes; SIRD-RII, severe insulin- resistant diabetes with relative insulin insufficiency

**ESM Table 6: Lipid species differed significantly between MARD-II and MOD subgroups**

| Lipid species       | Discovery     |            | Validation    |             |
|---------------------|---------------|------------|---------------|-------------|
|                     | Coefficient # | p value ## | Coefficient # | p value ### |
| PC (32:1)           | -0.16         | 5.87E-05   | -0.26         | 1.27E-04    |
| PC (38:3)           | -0.23         | 1.89E-08   | -0.32         | 6.51E-06    |
| PC (O-36:1)         | 0.17          | 3.95E-05   | 0.23          | 1.72E-03    |
| PC (O-36:2)         | 0.21          | 5.56E-07   | 0.21          | 3.36E-03    |
| PC (P-36:2)         | 0.20          | 1.51E-06   | 0.32          | 6.27E-06    |
| PC (P-40:5)         | 0.16          | 6.74E-05   | 0.25          | 5.18E-04    |
| PC (P-40:6)         | 0.15          | 1.96E-04   | 0.27          | 1.43E-04    |
| LPC (19:0)          | 0.18          | 1.29E-05   | 0.15          | 3.56E-02    |
| LPC (19:1)          | 0.22          | 4.18E-08   | 0.20          | 5.65E-03    |
| LPC (O-22:0)        | 0.22          | 1.38E-07   | 0.15          | 4.32E-02    |
| LPC (O-22:1)        | 0.19          | 2.10E-06   | 0.14          | 5.00E-02    |
| LPC (O-24:0)        | 0.20          | 1.11E-06   | 0.23          | 1.66E-03    |
| LPC (O-24:1)        | 0.21          | 1.96E-07   | 0.14          | 4.29E-02    |
| LPC (O-24:2)        | 0.27          | 1.52E-11   | 0.19          | 8.21E-03    |
| PE (36:1)           | -0.19         | 1.59E-06   | -0.18         | 7.38E-03    |
| PE (38:3)           | -0.17         | 4.73E-05   | -0.20         | 5.37E-03    |
| PE (40:6)           | -0.16         | 9.28E-05   | -0.14         | 4.36E-02    |
| PI (32:1)           | -0.19         | 3.40E-06   | -0.27         | 1.01E-04    |
| Hex1Cer(d18:1/24:0) | 0.20          | 1.69E-06   | 0.21          | 4.05E-03    |
| SM (36:0)           | -0.23         | 3.63E-09   | -0.26         | 1.31E-04    |
| SM (38:0)           | -0.20         | 5.81E-07   | -0.35         | 1.54E-07    |
| SM (41:0)           | -0.13         | 8.15E-04   | -0.19         | 5.22E-03    |
| SM (44:3)           | 0.15          | 2.65E-04   | 0.28          | 4.85E-05    |

# a positive coefficient indicates lipid levels were higher in MARD-II as compared to MOD subgroup. Vice versa, a negative coefficient indicates lipid levels were lower in MARD-II as compared to MOD subgroup.

## p value < 0.0011 was considered statistically significant in discovery cohort based on Bonferroni correction threshold 0.05/45=0.0011

### lipids in validation cohort with a nominal p < 0.05 and having the same coefficient direction as that in discovery cohort were considered statistically significant.

PC, phosphatidylcholine; LPC, lysophosphatidylcholine; PE, phosphatidylethanolamine; Cer, ceramide; SM, sphingomyelin; MOD, mild obesity- related diabetes; MARD-II, mild age- related diabetes with insulin insufficiency

**ESM Table 7: Adverse clinical outcomes in three novel subgroups**

| <b>Outcome</b>                        | <b>Overall</b>  | <b>MOD</b>     | <b>SIRD-RII</b>   | <b>MARD-II</b>  |
|---------------------------------------|-----------------|----------------|-------------------|-----------------|
| <b>Progressive CKD #</b>              |                 |                |                   |                 |
| Number of participants                | 554             | 246            | 113               | 195             |
| Cases/Person-years                    | 41/3853         | 12/1757        | 12/755            | 17/1342         |
| Incidence rate <sup>##</sup> (95% CI) | 10.6 (7.6-14.4) | 6.8 (3.5-11.9) | 15.9 (8.2 - 27.8) | 12.7 (7.4-20.3) |
| <b>Incident Heart failure</b>         |                 |                |                   |                 |
| Number of participants                | 687             | 307            | 130               | 250             |
| Cases/person-years                    | 38/4850         | 14/2201        | 13/897            | 11/1753         |
| Incidence rate <sup>#</sup> (95% CI)  | 7.8 (5.5-10.8)  | 6.4 (3.5-10.7) | 14.5 (7.7-24.8)   | 6.3 (3.1-11.2)  |
| <b>MACE</b>                           |                 |                |                   |                 |
| Number of participants                | 687             | 307            | 130               | 250             |
| Cases/person-years                    | 35/4764         | 18/2136        | 7/910             | 10/1719         |
| Incidence rate <sup>##</sup> (95% CI) | 7.3 (5.1-10.2)  | 8.4 (5.0-13.3) | 7.7 (3.1-15.9)    | 5.8 (2.8-10.7)  |
| <b>Stroke ###</b>                     |                 |                |                   |                 |
| Number of participants                | 687             | 307            | 130               | 250             |
| Cases/person-years                    | 14/4782         | 6/2150         | 3/910             | 5/1723          |
| Incidence rate <sup>##</sup> (95% CI) | 2.9 (1.6-4.9)   | 2.8 (1.0-6.1)  | 3.3 (0.7-9.6)     | 2.9 (0.9-6.8)   |
| <b>AMI ###</b>                        |                 |                |                   |                 |
| Number of participants                | 687             | 307            | 130               | 250             |
| Cases/person-years                    | 12/4790         | 9/2146         | 2/918             | 1/1727          |
| Incidence rate <sup>##</sup> (95% CI) | 2.5 (1.3-4.4)   | 4.2 (1.9-8.0)  | 2.2 (0.3-7.9)     | 0.6 (0.02-3.2)  |
| <b>All-cause mortality</b>            |                 |                |                   |                 |
| Number of participants                | 687             | 307            | 130               | 250             |
| Cases/person-years                    | 40/4814         | 17/2167        | 8/918             | 15/1730         |
| Incidence rate <sup>##</sup> (95% CI) | 8.3 (5.9-11.3)  | 7.9 (4.6-12.6) | 8.7 (3.8-17.2)    | 8.7 (4.8-14.3)  |

CKD, chronic kidney disease, MACE, major adverse cardiovascular events; AMI, acute myocardial infarction

# Only participants with baseline eGFR above 60 ml/min/1.73m<sup>2</sup> were included in the analysis on progressive CKD

## Incidence rates were presented as events per 1,000 person-years.

### stroke and AMI events were not analysed separately due to small event numbers.

MOD, mild obesity- related diabetes; SIRD-RII, severe insulin- resistant diabetes with relative insulin insufficiency; MARD-II, mild age- related diabetes with insulin insufficiency

**ESM Table 8: Effect of sex on cluster analysis by k-means**

| Original clustering | New clustering after adjustment for sex |             |             | Total      |
|---------------------|-----------------------------------------|-------------|-------------|------------|
|                     | MOD                                     | SIRD-RII    | MARD-II     |            |
| MOD                 | 289 (94.1%)                             | 13 (4.2%)   | 5 (1.6%)    | 307 (100%) |
| SIDD- RII           | 6 (4.6%)                                | 113 (86.9%) | 11 (8.5%)   | 130 (100%) |
| MARD-II             | 15 (6.0%)                               | 8 (3.2%)    | 227 (91.8%) | 250 (100%) |

MOD, mild obesity- related diabetes; SIRD-RII, severe insulin- resistant diabetes with relative insulin insufficiency; MARD-II, mild age- related diabetes with insulin insufficiency

**ESM Table 9: Risks for adverse clinical outcomes in novel subgroups derived from ANDIS cohort centroids**

|                                        | SIDD            | SIRD            | MOD             | MARD            |
|----------------------------------------|-----------------|-----------------|-----------------|-----------------|
| <b>Progressive CKD #</b>               |                 |                 |                 |                 |
| Number of participants                 | 94              | 108             | 127             | 225             |
| Cases/Person-years                     | 10/628.0        | 6/770.2         | 9/880.3         | 16/1573.6       |
| Incidence rate <sup>###</sup> (95% CI) | 15.9 (7.6-29.2) | 7.8 (2.9-17.0)  | 10.2 (4.7-19.4) | 10.2 (5.8-16.5) |
| <b>Heart failure</b>                   |                 |                 |                 |                 |
| Number of participants                 | 115             | 136             | 151             | 285             |
| Cases/person-years                     | 10/796.1        | 7/974.8         | 7/1076.1        | 14/2003.2       |
| Incidence rate <sup>###</sup> (95% CI) | 12.5 (6.0-23.1) | 7.2 (2.9-14.8)  | 6.5 (2.6-13.4)  | 7.0 (3.8-11.7)  |
| <b>MACE</b>                            |                 |                 |                 |                 |
| Number of participants                 | 115             | 136             | 151             | 285             |
| Cases/person-years                     | 7/807.6         | 8/950.5         | 5/1058.5        | 15/1947.0       |
| Incidence rate <sup>###</sup> (95% CI) | 8.7 (3.5-17.9)  | 8.4 (3.6-16.6)  | 4.7 (1.5-11.0)  | 7.7 (4.3-12.7)  |
| <b>All-cause mortality</b>             |                 |                 |                 |                 |
| Number of participants                 | 115             | 136             | 151             | 285             |
| Cases/person-years                     | 8/816.4         | 11/960.7        | 4/1066.7        | 17/1971.0       |
| Incidence rate <sup>###</sup> (95% CI) | 9.8 (4.2-19.3)  | 11.1 (5.7-20.5) | 3.7 (1.0-9.6)   | 8.6 (5.0-13.8)  |

# Only participants with baseline eGFR above 60 ml/min/1.73m<sup>2</sup> were included in the analysis on progressive CKD

### Incidence rates were presented as event number per 1,000 person-years.

SIDD, severe insulin- deficient diabetes; SIRD, severe insulin- resistant diabetes; MOD, mild obesity-related diabetes; MARD, mild age-related diabetes

**ESM Table 10: Differences in fasting plasma glucose, c-peptide and HOMA indices between participants with type 1 diabetes (T1D) PRS score in top 5 percentiles and the remaining 95 percentiles**

|                                   | Participants with T1D<br>PRS $\geq$ 95 <sup>th</sup> percentile | Patients with T1D PRS <<br>95 <sup>th</sup> percentile | <i>p</i> value |
|-----------------------------------|-----------------------------------------------------------------|--------------------------------------------------------|----------------|
| Number of participants            | 38                                                              | 648                                                    |                |
| Novel subgroups, N (%)            |                                                                 |                                                        | 0.02           |
| MOD                               | 9 (2.9)                                                         | 298 (97.1)                                             |                |
| SIRD-RII                          | 12 (9.2)                                                        | 118 (91.8)                                             |                |
| MARD-II                           | 17 (6.8)                                                        | 232 (93.2)                                             |                |
| Fasting plasma glucose,<br>mmol/L | 8.2 (2.5)                                                       | 7.6 $\pm$ 2.3                                          | 0.14           |
| C-peptide, pmol/L                 | 709 [541, 857]                                                  | 790 [560, 1062]                                        | 0.19           |
| HOMA2-B, %                        | 57 [46, 74]                                                     | 69 [49, 97]                                            | 0.02           |
| HOMA2-IR                          | 1.7 [1.3, 2.2]                                                  | 1.9 [1.3, 2.7]                                         | 0.39           |

T1D, type 1 diabetes; MOD, mild obesity- related diabetes; SIRD-RII, severe insulin- resistant diabetes with relative insulin insufficiency; MARD-II, mild age- related diabetes with insulin insufficiency

**EMS Table 11: Concordance between clusters derived from classifiers with HOMA indices included and that by replacing HOMA indices with TG/HDL cholesterol ratio**

| Original Cluster Analysis<br>(onset age, BMI, HbA1c,<br>HOMA2-B and HOMA2-IR) |          | Cluster Analysis Using Alternative Variables |             |             |
|-------------------------------------------------------------------------------|----------|----------------------------------------------|-------------|-------------|
|                                                                               |          | SIRD-RII                                     | MARD-II     | MOD         |
|                                                                               | SIRD-RII | 123 (94.6%)                                  | 6 (4.6%)    | 1 (1%)      |
|                                                                               | MARD-II  | 21 (8.4%)                                    | 217 (87.1%) | 11 (4.4%)   |
|                                                                               | MOD      | 6 (2.0%)                                     | 80 (26.0%)  | 221 (72.0%) |

Cohen's kappa =0.72

MOD, mild obesity- related diabetes; SIRD-RII, severe insulin- resistant diabetes with relative insulin insufficiency; MARD-II, mild age- related diabetes with insulin insufficiency

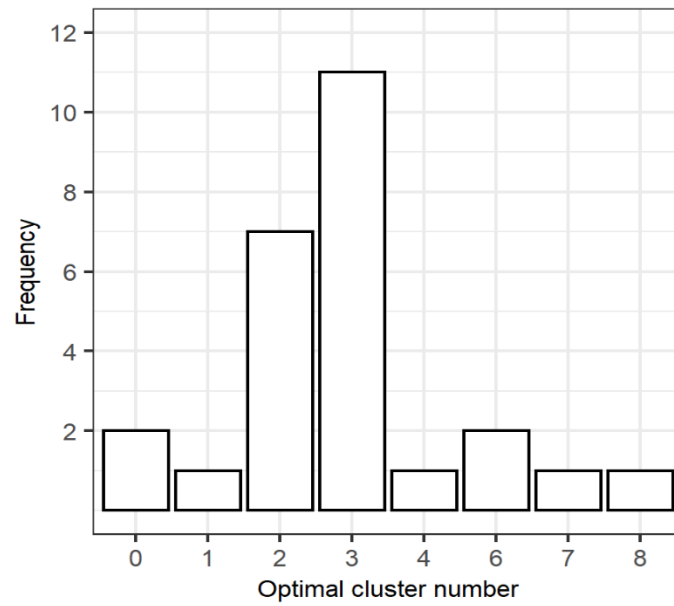

**ESM Figure 1: Determination of optimal cluster number by majority voting from 26 metrics using R package “NbClust”**

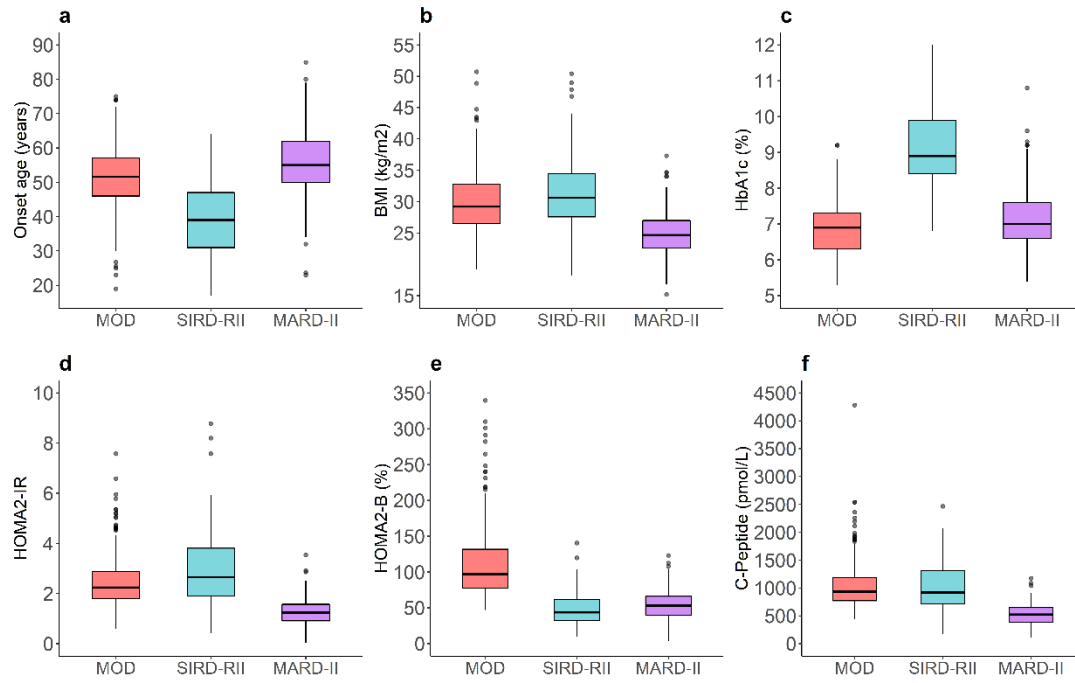

**ESM Figure 2: Levels of clinical classifiers in three novel subgroups**



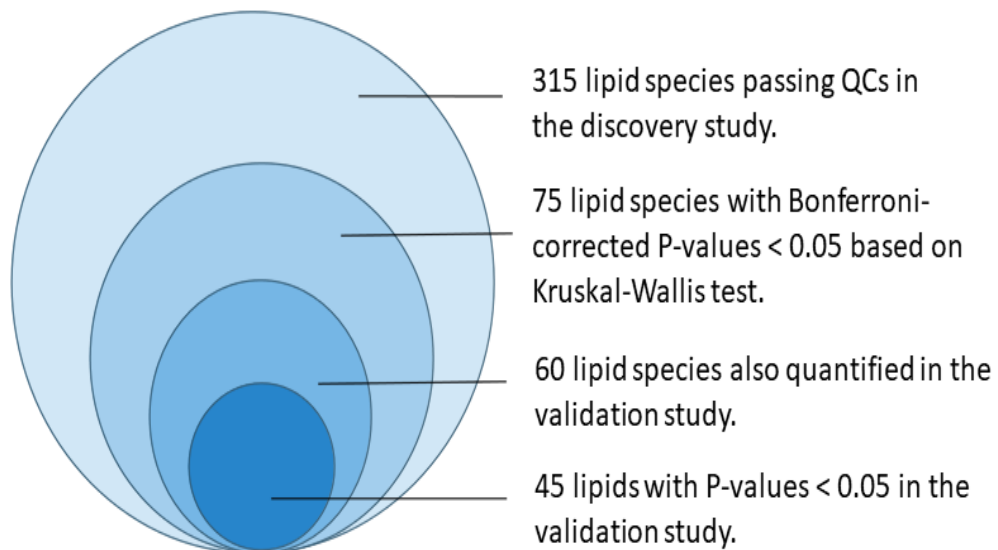

**ESM Figure 3: procedure of statistical analysis on lipidomics data**

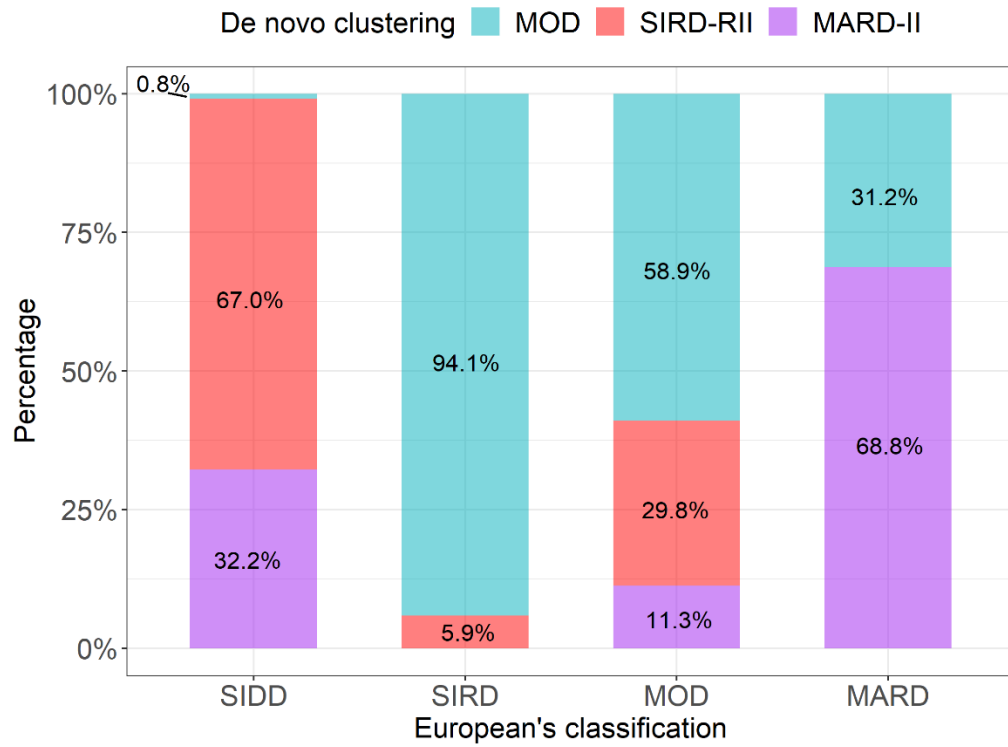

**ESM Figure 4: Overlapping between clusters derived from centroids of ANDIS cohort (*Ahlqvist et al. Lancet Diabetes and Endocrinology* 2018;6:361) and those from de novo clustering**

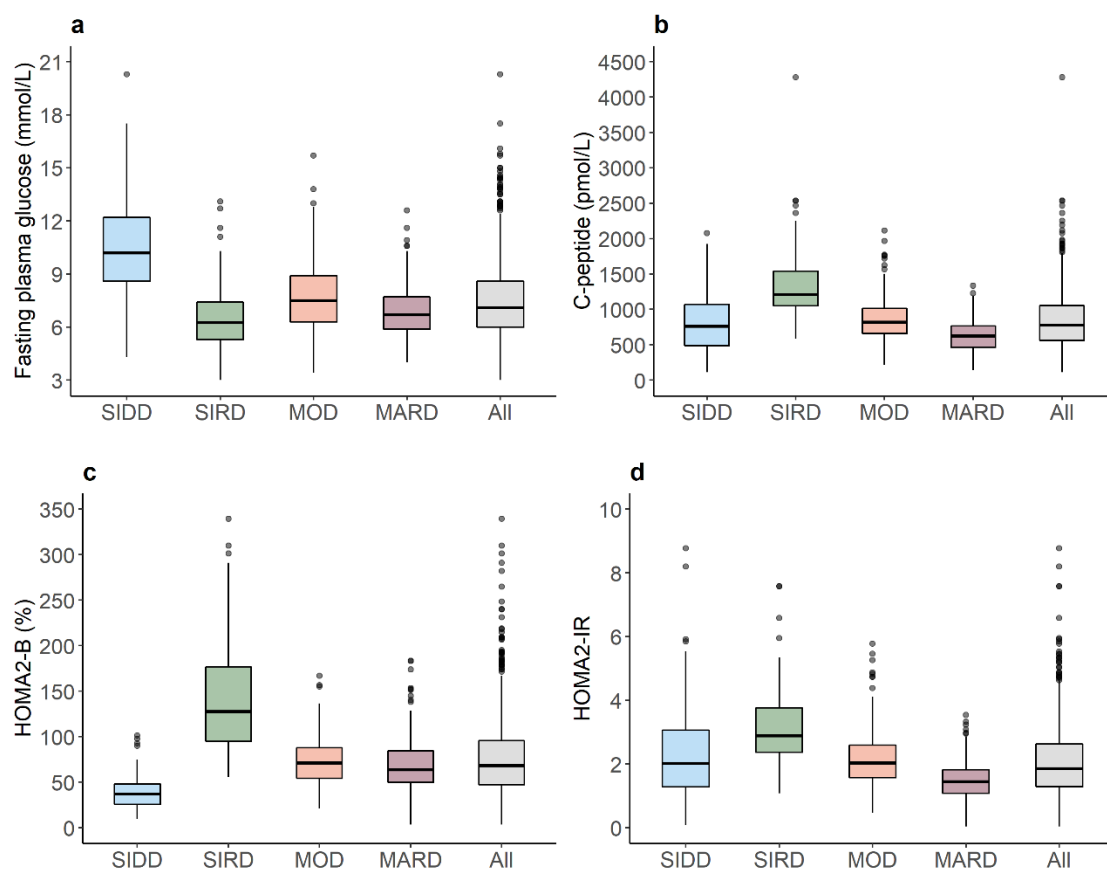

**ESM Figure 5: Fasting glucose, C-peptide, HOMA2-B and HOMA2-IR levels in novel subgroups derived from ANDIS cohort centroids**

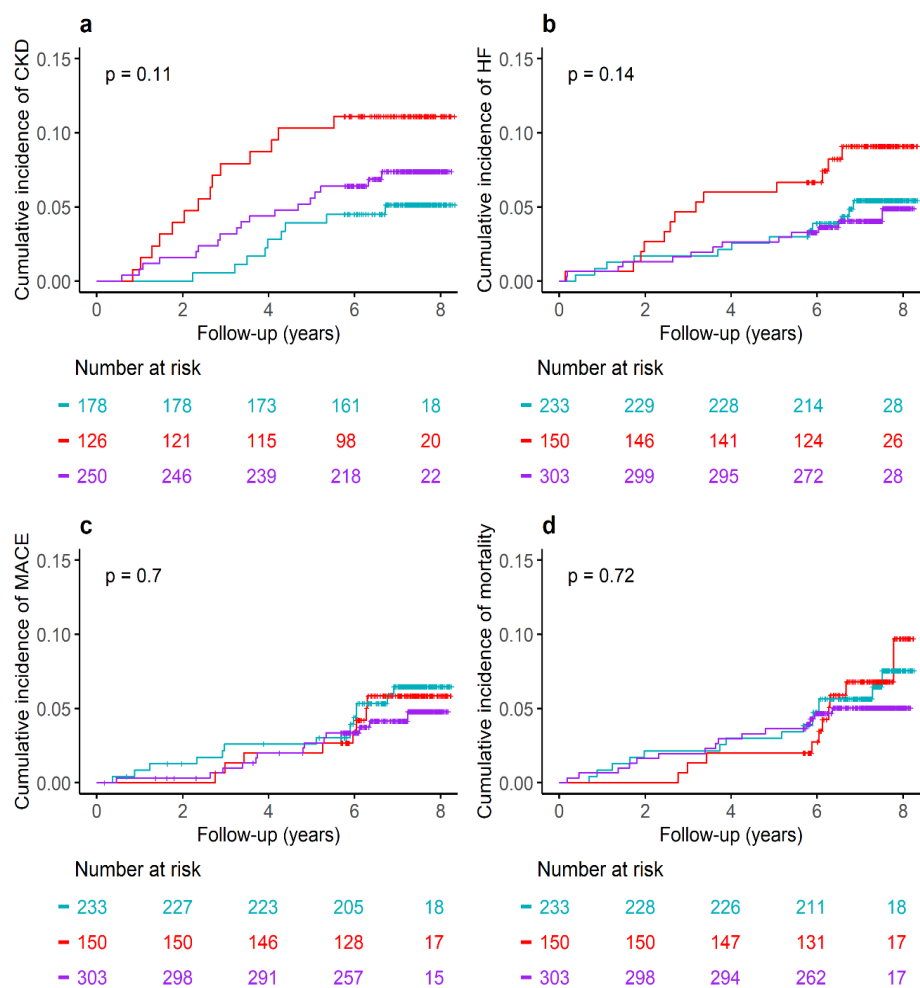

**ESM Figure 6: Cumulative risk for cardio-renal events in clusters classified by diabetes onset age, BMI, HbA1c and Triacylglycerol/HDL cholesterol ratio**
